# Supplementary material
Source: bioRxiv or medRxiv preprint supplement (https://www.medrxiv.org/highwire/filestream/74134/field_highwire_adjunct_files/0/2020.03.19.20038364-1.pdf)
Supplement: Supplementary file [file 2020.03.19.20038364-1.pdf]

## SUPPLEMENTAL MATERIALS

**Supplemental Table 1.** Inclusion table of patient subpopulation for analysis with at least one hour of mechanical ventilation.

| Requirement                                         | Offset |       |       |       |
|-----------------------------------------------------|--------|-------|-------|-------|
|                                                     | 0      | 12    | 24    | 48    |
| All MIMIC-III encounters                            | 53432  | 53432 | 53432 | 53432 |
| Age exists, age at least 18                         | 53332  | 53332 | 53332 | 53332 |
| Metavision                                          | 24048  | 24048 | 24048 | 24048 |
| At least 1 observation of each required measurement | 23502  | 23502 | 23502 | 23502 |
| Mechanical ventilation                              | 9494   | 9494  | 9494  | 9494  |
| Qualifying stay duration                            | 9404   | 9202  | 8136  | 6000  |

**Supplemental Table 2.** Clinical features included for analysis in patient subpopulations with no required mechanical ventilation, and with at least one hour of mechanical ventilation. GCS = Glasgow Coma Scale; HR = Heart Rate; INR = International Normalised Ratio; MAP = Mean Arterial Pressure; PP = Pulse Pressure; SpO2 = Peripheral Capillary Oxygen Saturation; WBC = White Blood Cell Count

| Clinical Features |
|-------------------|
| Age               |
| Antibiotics       |
| Bilirubin         |
| Blood Culture     |
| Creatinine        |
| Diastolic BP      |
| Fluid Bolus       |
| GCS               |
| HR                |
| INR               |
| Lactate           |
| MAP               |
| Organ Dysfunction |
| PP                |
| Platelets         |
| Resp. Rate        |
| SpO2              |
| Systolic BP       |
| Temp.             |
| Urine Output      |
| WBC               |
| pH                |

**Supplemental Table 3.** Model performance metrics at 0-, 12-, 24-, and 48-hour prediction windows, on the patient subpopulation test set with at least one hour of mechanical ventilation. AUROC: area under the receiving operator curve; DOR: diagnostic odds ratio; LR+ and LR-: positive and negative likelihood ratios, respectively. Values presented are means and standard deviations for the metrics across 10 folds.

|                    | <b>Onset</b>      | <b>12</b>         | <b>24</b>         | <b>48</b>           |
|--------------------|-------------------|-------------------|-------------------|---------------------|
| <b>AUROC</b>       | 0.843<br>(0.015)  | 0.858<br>(0.022)  | 0.810<br>(0.044)  | 0.796<br>(0.112)    |
| <b>Sensitivity</b> | 0.800<br>(0.000)  | 0.778<br>(0.000)  | 0.818<br>(0.000)  | 0.667<br>(0.000)    |
| <b>Specificity</b> | 0.733<br>(0.040)  | 0.810<br>(0.072)  | 0.671<br>(0.115)  | 0.910<br>(0.127)    |
| <b>F1</b>          | 0.159<br>(0.019)  | 0.142<br>(0.040)  | 0.066<br>(0.029)  | 0.094<br>(0.098)    |
| <b>DOR</b>         | 11.274<br>(2.169) | 17.107<br>(6.838) | 11.382<br>(7.924) | 89.235<br>(117.989) |
| <b>LR+</b>         | 3.055<br>(0.434)  | 4.579<br>(1.520)  | 2.888<br>(1.441)  | 30.412<br>(39.330)  |
| <b>LR-</b>         | 0.274<br>(0.016)  | 0.276<br>(0.027)  | 0.279<br>(0.049)  | 0.375<br>(0.073)    |
| <b>Accuracy</b>    | 0.734<br>(0.039)  | 0.808<br>(0.070)  | 0.671<br>(0.113)  | 0.913<br>(0.129)    |
| <b>Recall</b>      | 0.767<br>(0.000)  | 0.722<br>(0.000)  | 0.727<br>(0.000)  | 0.300<br>(0.105)    |

**Supplemental Table 4.** Feature importances. Most important features across prediction times on the patient subpopulation test set with no required mechanical ventilation, determined by the relative average information gain across all trees in the ensemble and scaled according to lookahead time. GCS = Glasgow Coma Scale; HR = Heart Rate; INR = International Normalised Ratio; MAP = Mean Arterial Pressure; PP = Pulse Pressure; SpO2 = Peripheral Capillary Oxygen Saturation; WBC = White Blood Cell Count

|                          | <b>Onset</b> | <b>12</b> | <b>24</b> | <b>48</b> |
|--------------------------|--------------|-----------|-----------|-----------|
| <b>Age</b>               | 0.004115     | 0         | 0         | 0.053510  |
| <b>Antibiotics</b>       | 0.261102     | 1         | 1         | 0.743631  |
| <b>Bilirubin</b>         | 0.001402     | 0.008645  | 0         | 0.583681  |
| <b>Blood cultures</b>    | 0            | 0         | 0         | 0         |
| <b>Creatinine</b>        | 0.056243     | 0.00803   | 0         | 0.079805  |
| <b>Diastolic BP</b>      | 0.04635      | 0.015093  | 0.022645  | 0.155653  |
| <b>Fluid Bolus</b>       | 0.030919     | 0.009978  | 0.042103  | 0.103617  |
| <b>GCS</b>               | 1            | 0.355869  | 0         | 0.418873  |
| <b>HR</b>                | 0.018309     | 0.028341  | 0.117448  | 0.552735  |
| <b>INR</b>               | 0.001856     | 0         | 0         | 0.316773  |
| <b>Lactate</b>           | 0.045153     | 0.012959  | 0         | 0.417665  |
| <b>MAP</b>               | 0.10657      | 0.022658  | 0         | 0.101288  |
| <b>Organ Dysfunction</b> | 0.001482     | 0.002276  | 0         | 0.603887  |
| <b>PP</b>                | 0.024534     | 0.018626  | 0.068241  | 0.245032  |
| <b>Platelets</b>         | 0.003704     | 0.004354  | 0.019733  | 0.327886  |
| <b>Resp. Rate</b>        | 0.051007     | 0.056339  | 0.020247  | 0.413433  |
| <b>SpO2</b>              | 0.053115     | 0.065467  | 0         | 1         |
| <b>Systolic BP</b>       | 0.022387     | 0.039432  | 0.017186  | 0.162508  |
| <b>Temp.</b>             | 0.005873     | 0.014421  | 0.02879   | 0.143157  |
| <b>WBC</b>               | 0.016341     | 0.010967  | 0         | 0.221133  |
| <b>Urine output</b>      | 0            | 0         | 0         | 0.003511  |
| <b>pH</b>                | 0.10487      | 0.011362  | 0.040173  | 0.232714  |

Due to the data extraction process, features are represented in the MLA by multiple columns in the data matrices, each of which are treated as individual latent features. The importance scores presented here are the average importance across those latent features, scaled within lookahead times to give a relative average importance score.

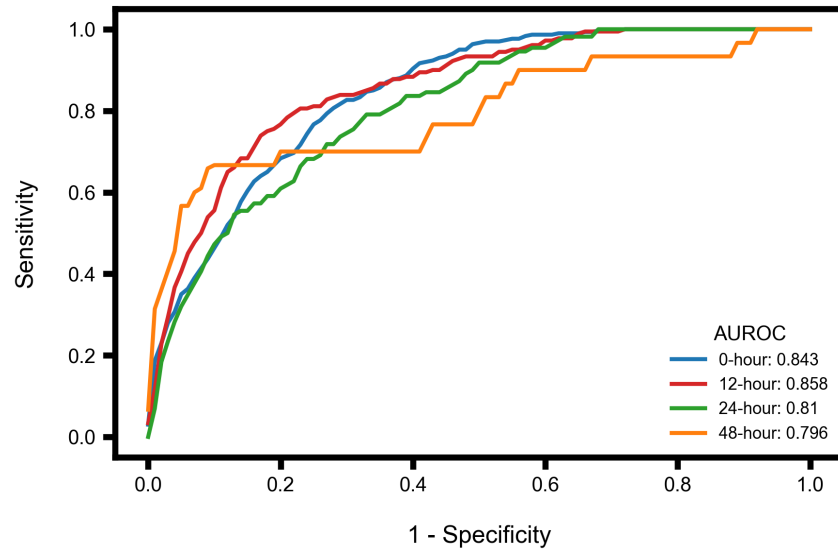

**Supplemental Figure 1.** Area Under Receiver Operating Characteristic (AUROC) curves and values for ARDS onset detection and prediction at 12, 24, and 48 hours prior to onset, on the patient subpopulation test set with at least one hour of mechanical ventilation. Curves are averaged across 10 folds.
